# Supplementary material for: Inhibition of DNA Repair Mechanisms and Induction of Apoptosis in Triple Negative Breast Cancer Cells Expressing the Human Herpesvirus 6 U94
Source: MDPI journal article supplement (doi:10.3390/cancers11071006), 2019-07-18
Supplement: s1 [file s1]

# Supplementary Materials: Inhibition of DNA repair mechanisms and induction of apoptosis in triple negative breast cancer cells expressing the human herpesvirus 6 U94

F. Caccuri, M. Sommariva, S. Marsico, F. Giordano, A. Zani, A. Giacomini, C. Fraefel, A. Balsari, A. Caruso

Figure 5

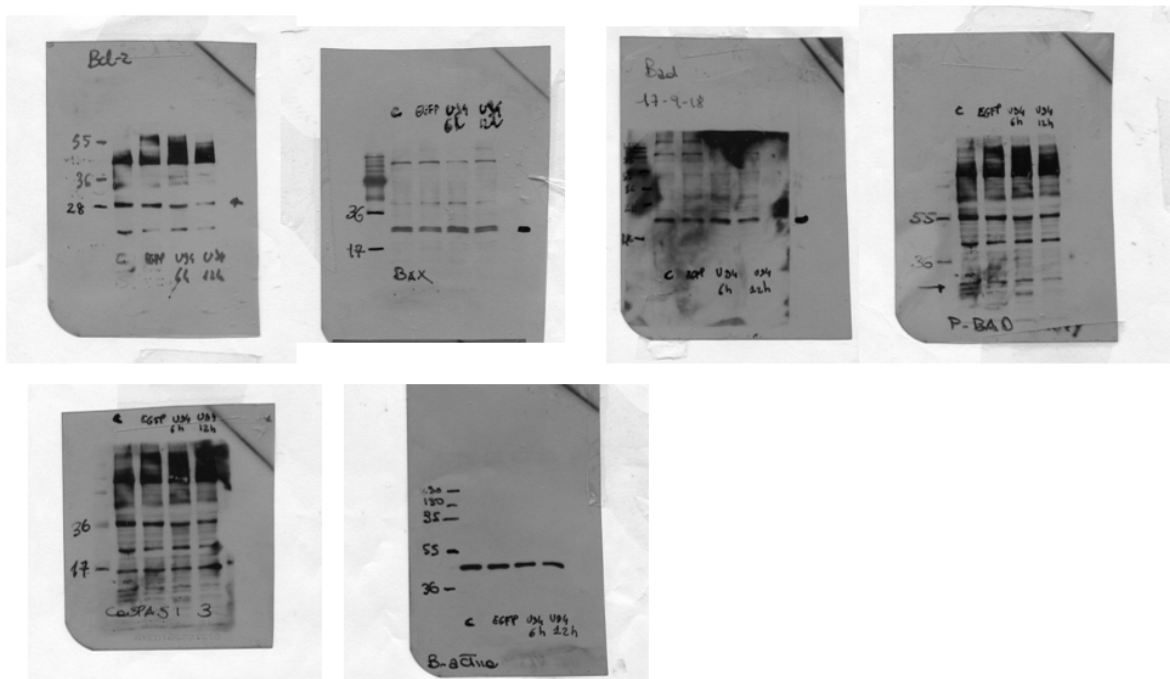

**Figure S1.** Immunoblots of Bcl-2, Bax, Bad, pBad, Cleaved Caspase 3 and Actin protein levels in MDA-MB-231 cells.

Figure 6

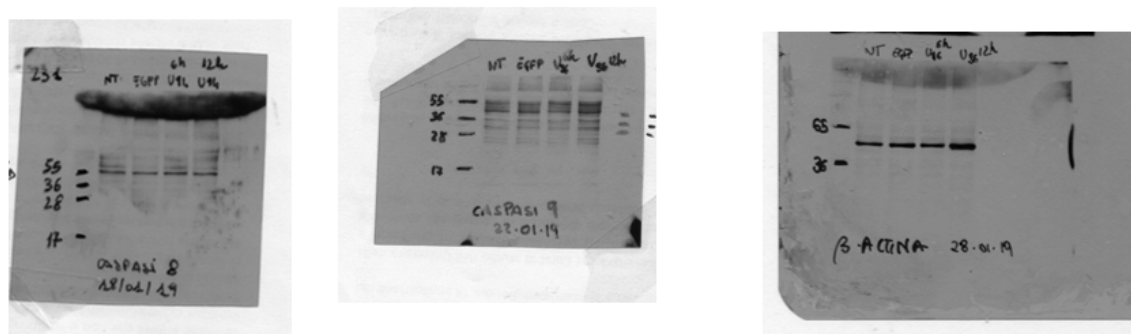

**Figure S2.** Immunoblots of Caspase 8, Cleaved Caspase 8, Caspase 9, Cleaved Caspase 9 and Actin protein levels in MDA-MB-231 cells.

**Figure 7**

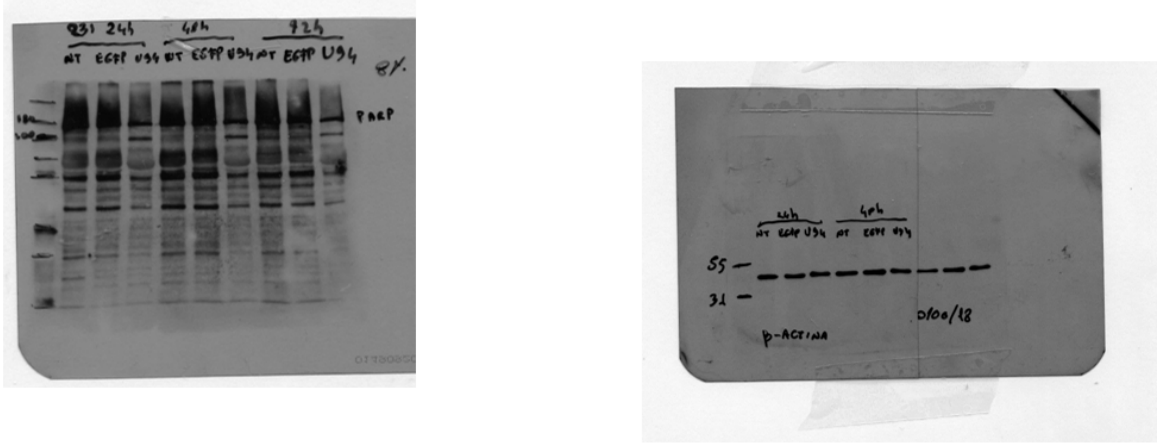

**Figure S3.** Immunoblots of PARP and Actin protein levels in MDA-MB-231 cells.

**Figure 5**

| Bcl-2 |            |  |            |            | Bax |            |  |            |            |
|-------|------------|--|------------|------------|-----|------------|--|------------|------------|
| NT    | EGFP       |  | 6h         | 12h        | NT  | EGFP       |  | 6h         | 12h        |
| 1     | 0,96110338 |  | 0,5084393  | 0,64792486 | 1   | 0,77747511 |  | 1,53556489 | 1,51969333 |
| 1     | 1,03297933 |  | 0,68279364 | 0,50841497 | 1   | 0,89144076 |  | 1,56392828 | 1,59370475 |
| 1     | 0,887215   |  | 0,6357     | 0,583212   | 1   | 0,832658   |  | 1,549299   | 1,55553    |

  

| Bad |            |  |            |            | pBad |            |  |            |            |
|-----|------------|--|------------|------------|------|------------|--|------------|------------|
| NT  | EGFP       |  | 6h         | 12h        | NT   | EGFP       |  | 6h         | 12h        |
| 1   | 0,77747456 |  | 1,53556438 | 1,51969369 | 1    | 0,74358561 |  | 0,51276018 | 0,20581413 |
| 1   | 0,84951617 |  | 1,49593165 | 1,63350633 | 1    | 0,75854124 |  | 0,49975483 | 0,29642774 |
| 1   | 0,813166   |  | 1,515929   | 1,576079   | 1    | 0,750707   |  | 0,506568   | 0,248961   |

  

| Cleaved caspase-3 |            |  |            |            | Bcl-2/Bax |            |  |            |            |
|-------------------|------------|--|------------|------------|-----------|------------|--|------------|------------|
| NT                | EGFP       |  | 6 h        | 12 h       | NT        | EGFP       |  | 6h         | 12h        |
| 1                 | 1,12034752 |  | 1,75899214 | 2,28696719 | 1         | 1,2361854  |  | 0,33110896 | 0,42635237 |
| 1                 | 1,5667132  |  | 1,46044393 | 2,52576278 | 1         | 1,16877507 |  | 0,43658884 | 0,31901453 |
| 1                 | 1,312589   |  | 1,630413   | 2,389812   | 1         | 1,0655215  |  | 0,4103146  | 0,37492816 |

## Figure 6

### Cleaved caspase-9

| NT | EGFP       | 6h         | 12h        |
|----|------------|------------|------------|
| 1  | 1,04458143 | 1,10432368 | 1,79499241 |
| 1  | 0,91997186 | 0,88487436 | 1,58680496 |
| 1  | 0,979544   | 0,989787   | 1,686333   |

## Figure 7

### Cleaved PARP

| NT | EGFP       | U94        | NT | EGFP       | U94        |
|----|------------|------------|----|------------|------------|
| 1  | 0,94208614 | 2,24469569 | 1  | 0,86613968 | 2,30948183 |
| 1  | 1,54408526 | 2,47501127 | 1  | 1,53580134 | 2,44017187 |
| 1  | 1,230654   | 2,355097   | 1  | 1,178869   | 2,370514   |

**24h**

**48h**

**Figure S4.** Densitometry readings/intensity ratio of each band.
